# Supplementary material
Source: PubMed Central journal article supplement (PMC2100419)

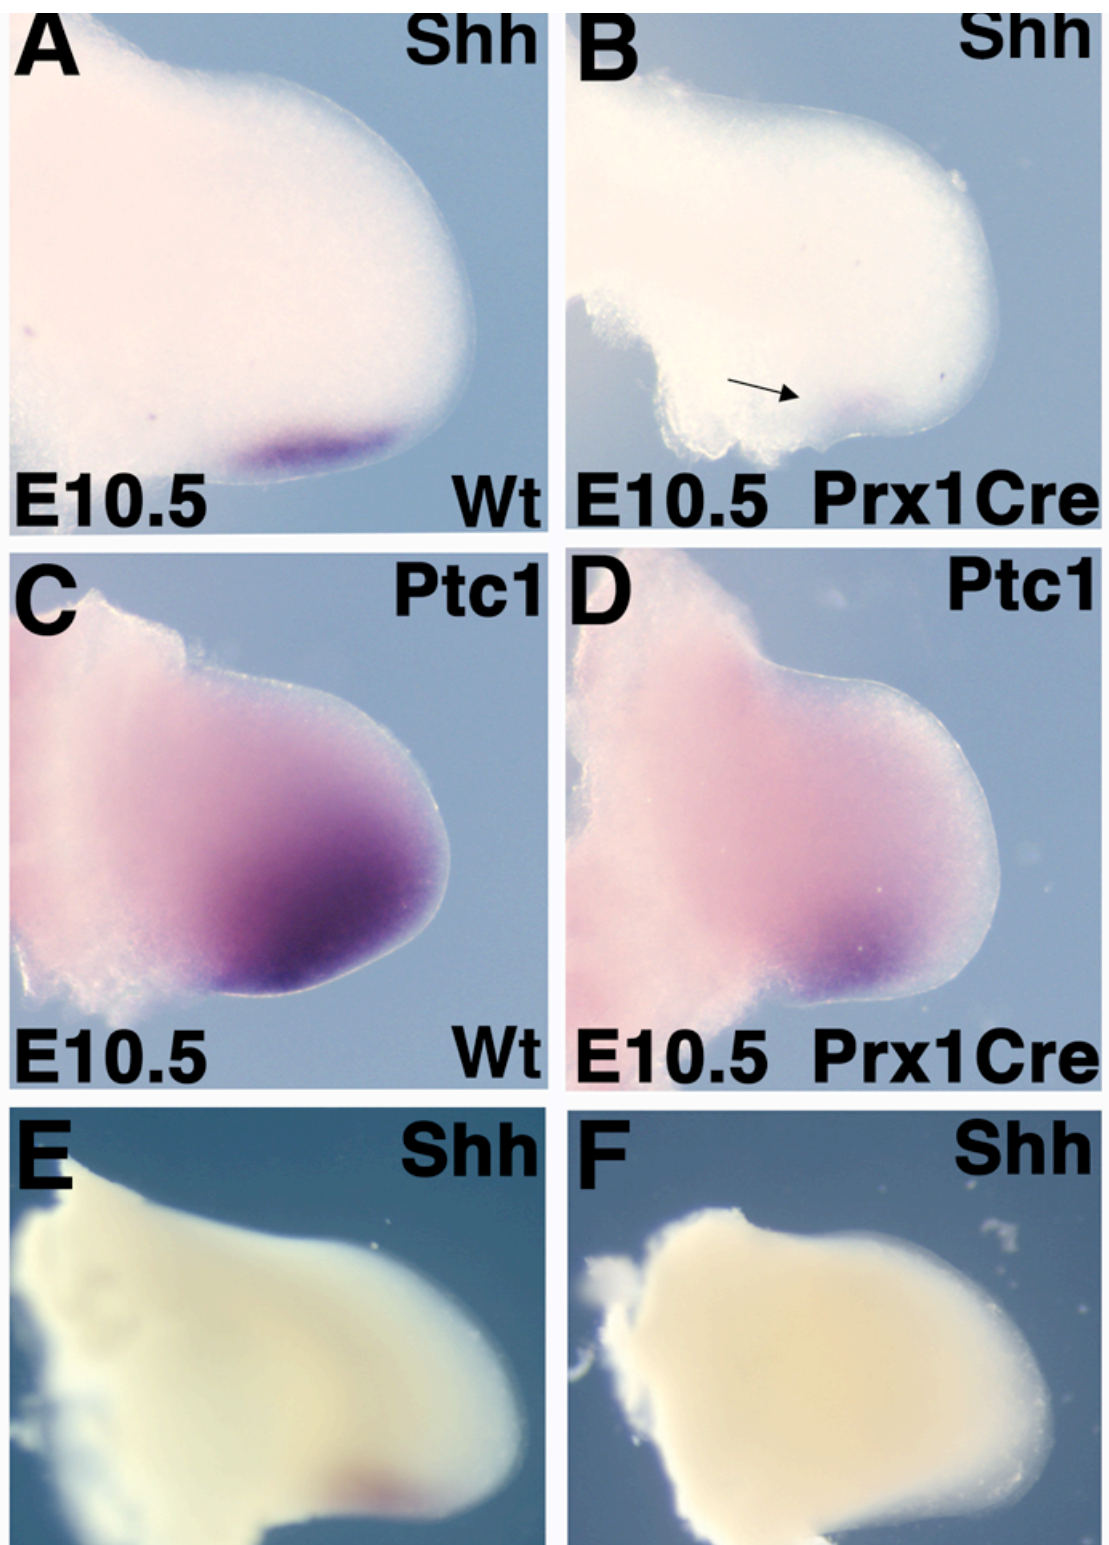

Supplement: NIHMS29110-supplement-01.pdf [file NIHMS29110-supplement-01.pdf]
